1 Motor Function and White Matter Connectivity in Children Treated  
2 with Therapeutic Hypothermia for Neonatal Encephalopathy

3 Arthur P.C. Spencer<sup>a,b</sup>, Jonathan C.W. Brooks<sup>a,c</sup>, Naoki Masuda<sup>d,e</sup>, Hollie Byrne<sup>a,f</sup>, Richard  
4 Lee-Kelland<sup>b</sup>, Sally Jary<sup>b</sup>, Marianne Thoresen<sup>b,g</sup>, Marc Goodfellow<sup>h,i,j,k</sup>, Frances M. Cowan<sup>b,l</sup>,  
5 Ela Chakkarapani<sup>b,m\*</sup>

6

7 <sup>a</sup>Clinical Research and Imaging Centre, University of Bristol, Bristol, UK

8 <sup>b</sup>Translational Health Sciences, Bristol Medical School, University of Bristol, Bristol, UK

9 <sup>c</sup>School of Psychology, University of East Anglia, Norwich, UK

10 <sup>d</sup>Department of Mathematics, State University of New York at Buffalo, Buffalo, NY, USA

11 <sup>e</sup>Computational and Data-Enabled Science and Engineering Program, State University of  
12 New York at Buffalo, Buffalo, NY, USA

13 <sup>f</sup>Department of Paediatrics, University of Melbourne, Melbourne, Australia

14 <sup>g</sup>Faculty of Medicine, Institute of Basic Medical Sciences, University of Oslo, Oslo, Norway

15 <sup>h</sup>Living Systems Institute, University of Exeter, Exeter, UK

16 <sup>i</sup>Wellcome Trust Centre for Biomedical Modelling and Analysis, University of Exeter, Exeter,  
17 UK

18 <sup>j</sup>EPSRC Centre for Predictive Modelling in Healthcare, University of Exeter, Exeter, UK

19 <sup>k</sup>College of Engineering, Mathematics and Physical Sciences, University of Exeter, Exeter, UK

20 <sup>l</sup>Department of Paediatrics, Imperial College London, London, UK

21 <sup>m</sup>Neonatal Intensive Care Unit, St Michael's Hospital, University Hospitals Bristol and  
22 Weston NHS Foundation Trust, Bristol, UK

23

24 \*Corresponding author; Dr Ela Chakkarapani; Translational Health Sciences, University of  
25 Bristol, Bristol BS2 8EG, UK; [ela.chakkarapani@bristol.ac.uk](mailto:ela.chakkarapani@bristol.ac.uk)

26 **Data availability statement**

27 The raw data that support these findings are available upon reasonable request to the  
28 corresponding author.

29

30 **Funding statement**

31 This work was supported by the Baily Thomas Charitable Fund (TRUST/VC/AC/SG4681-  
32 7596), David Telling Charitable Trust, as well as Sparks (05/BTL/01 and 14/BTL/01) and the  
33 Moulton Foundation. AS is supported by the Wellcome Trust (WT220070/Z/20/Z). JB is  
34 supported by the UK Medical Research Council (MR/N026969/1). MG is supported by the  
35 EPSRC (EP/N014391/1) and by a Wellcome Trust Institutional Strategic Support Award  
36 (WT105618MA).

37

38 **Conflict of interest disclosure**

39 The authors have no conflicts of interest to declare.

40

41 **Ethics approval statement**

42 Ethical approval was obtained from the North Bristol Research Ethics Committee and the  
43 Health Research Authority (REC ID: 15/SW/0148).

44

45 **Patient consent statement**

46 Informed and written consent was obtained from the parents of participants, in accordance  
47 with the Declaration of Helsinki.

48

49 **Acknowledgements**

50 We thank the children and their families for participating, Ngoc Jade Thai for her assistance  
51 with MR sequences and Aileen Wilson for her radiographical expertise.

52 **Abstract**

53 Therapeutic hypothermia reduces the incidence of severe motor disability, such as cerebral  
54 palsy, following neonatal hypoxic-ischemic encephalopathy. However, cooled children  
55 without cerebral palsy at school-age demonstrate motor deficits and altered white matter  
56 connectivity. In this study, we used diffusion-weighted imaging to investigate the  
57 relationship between white matter connectivity and motor performance, measured using  
58 the Movement Assessment Battery for Children-2, in school-age children treated with  
59 therapeutic hypothermia for neonatal hypoxic ischaemic encephalopathy at birth, who did  
60 not develop cerebral palsy (cases), and matched controls. Analysis of tract-level  
61 microstructure (33 cases, 36 controls) revealed correlations between total motor scores and  
62 fractional anisotropy, in cases but not controls, in the anterior thalamic radiation bilaterally,  
63 the inferior fronto-occipital fasciculus bilaterally and both the hippocampal and cingulate  
64 gyrus parts of the left cingulum. Analysis of structural brain networks (22 cases, 32 controls),  
65 in which edges were determined by probabilistic tractography and weighted by fractional  
66 anisotropy, revealed correlations between total motor scores and several whole-brain  
67 network metrics in cases but not controls. We then investigated edge-level association with  
68 motor function using the network-based statistic. This revealed subnetworks which  
69 exhibited group differences in the association between motor outcome and edge weights,  
70 for total motor scores as well as for balance and manual dexterity domain scores. All three  
71 of these subnetworks comprised numerous frontal lobe regions known to be associated  
72 with motor function, including the superior frontal gyrus and middle frontal gyrus. These  
73 findings demonstrate an association between impaired motor function and brain  
74 organisation in case children.

75 **Keywords**

76 Therapeutic hypothermia; neonatal encephalopathy; structural connectivity; brain  
77 networks; motor ability; white matter; fractional anisotropy.

## 78 Introduction

79 Neonatal hypoxic ischaemic encephalopathy (HIE), secondary to perinatal asphyxia,  
80 increases the risk of death and disability, including cerebral palsy (CP) (Marlow, 2005;  
81 O'Connor et al., 2017; Robertson et al., 1989). Even in the absence of CP, children who  
82 suffered HIE can develop motor impairments by school age (de Vries and Jongmans, 2010;  
83 van Kooij et al., 2010, 2008; van Schie et al., 2015). The treatment for NE, as recommended  
84 in the UK by the National Institute for Clinical Excellence  
85 (<https://www.nice.org.uk/guidance/ipg347>), is therapeutic hypothermia (TH), which  
86 involves cooling the infant's core temperature to 33.5°C for 72 hours commencing as soon  
87 as possible after the asphyxia (Azzopardi et al., 2009; Rutherford et al., 2010). TH improves  
88 outcome compared to non-cooled children with HIE, reducing the chance of death,  
89 disability, and severe motor impairment including CP (Azzopardi et al., 2014; Jacobs et al.,  
90 2013; Jary et al., 2015). However, recent studies have shown that school-age children who  
91 received TH at birth for HIE, and did not develop CP, exhibited motor and cognitive  
92 impairments to a degree not found in typically developing controls (Jary et al., 2019; Lee-  
93 Kelland et al., 2020; Tonks et al., 2019). Additionally, motor impairment at school age was  
94 not predicted by motor performance assessed using Bayley Scales of Infant & Toddler  
95 development at 18 months of age (Jary et al., 2019). These studies suggest that, despite the  
96 success of TH in reducing the occurrence of severe disabilities, aspects of brain development  
97 may remain affected by HIE. In our previous work, we identified disrupted white matter  
98 connectivity in school-age children without CP, who were given TH for HIE, and  
99 demonstrated an association between these structural connectivity deficits and cognitive  
100 impairments (Spencer et al., 2021). It is not yet understood how brain structure relates to  
101 motor ability following TH; understanding this relationship will provide insight into damage  
102 mechanisms following HIE treated with TH which alter development, and may inform  
103 follow-up care and the development of new interventions.

104 White matter microstructure and its large-scale structural connectivity are associated with  
105 motor function (Englander et al., 2015; López-Vicente et al., 2021). As white matter  
106 connectivity undergoes substantial changes around birth (Dennis and Thompson, 2013a;  
107 Dubois et al., 2014), with microstructural alterations continuing into adolescence (Cascio et  
108 al., 2007; Hagmann et al., 2010; Lebel et al., 2008; Simmonds et al., 2014), insult or injury at

109 birth (such as HIE) can have a lasting impact on brain organisation and functional outcome  
110 (Hüppi and Dubois, 2006). Diffusion-weighted imaging (DWI) allows non-invasive  
111 investigation of white matter organisation by measuring the diffusion of water molecules  
112 through brain tissue. This allows measurement of diffusion metrics such as fractional  
113 anisotropy (FA), which is affected by myelination and fibre density (Le Bihan and Johansen-  
114 Berg, 2012), offering clinically relevant characterisation of white matter microstructure  
115 (Assaf et al., 2019; Assaf and Pasternak, 2008; Dennis and Thompson, 2013b). This can be  
116 extended to the analysis of large-scale brain connectivity using a network neuroscience  
117 approach (Bassett and Sporns, 2017; Bullmore and Sporns, 2009; Fornito et al., 2013; Sporns  
118 et al., 2005). Structural brain networks, or connectomes, can be constructed by performing  
119 tractography in order to determine connections (edges) between brain regions (nodes), and  
120 weighting applied to edges according to diffusion properties of the white matter through  
121 which they track. Properties of brain networks can then be quantified using techniques from  
122 graph theory. This approach has been widely used to study typical and atypical brain  
123 development (Dennis and Thompson, 2013a; Hagmann et al., 2010; Morgan et al., 2018;  
124 Smyser et al., 2019).

125 In this study, we investigated the association between white matter connectivity and motor  
126 function in school-age children treated with TH for HIE at birth, who did not develop CP,  
127 compared to controls with no overt neurological problems, matched for age, sex and socio-  
128 economic status. We measured the correlation between motor outcome and tract-level  
129 microstructure using an age-specific atlas of white matter tracts (Spencer et al., 2020). We  
130 then constructed FA-weighted structural brain networks for each subject, using probabilistic  
131 tractography, and investigated the relationship between graph-theoretic network metrics  
132 and motor outcome. In order to further explore the relationship between brain organisation  
133 and motor function, we used the network-based statistic (NBS) (Zalesky et al., 2010) to  
134 determine subsets of connections (subnetworks) which exhibited group differences in the  
135 dependence of motor scores on edge weight.

## 136 Materials and Methods

### 137 Participants

138 Informed and written consent was obtained from the parents of participants, in accordance  
139 with the Declaration of Helsinki. Ethical approval was obtained from the North Bristol  
140 Research Ethics Committee and the Health Research Authority (REC ID: 15/SW/0148).

141 Case children were sequentially selected from the cohort of children who received TH  
142 between 2008 and 2011. These data are maintained by the Bristol Neonatal Neurosciences  
143 group at St Michael's Hospital, Bristol, UK, under previous ethics approval (REC ID:  
144 09/H0106/3). Eligibility criteria for the cases included: gestation at birth  $\geq 36$  weeks;  
145 received treatment with TH as standard clinical care based on TOBY trial eligibility criteria  
146 including signs of perinatal asphyxia and moderate to severe encephalopathy (confirmed by  
147 clinical examination and amplitude integrated electroencephalogram (Azzopardi et al.,  
148 2009)); cooling administered within six hours of birth and for at least 72 hours. Children  
149 were excluded if they had been found to have a metabolic or genetic disorder or if any  
150 major intracranial haemorrhage or structural brain abnormality could be seen on the  
151 neonatal MRI scan, if they were not native English speakers, or if they had any additional  
152 medical diagnosis other than HIE. All case children underwent neonatal MRI, which was  
153 qualitatively assessed, by an experienced perinatal neurologist (FC), for the presence and  
154 extent of brain injury. This was quantified, in the basal ganglia and thalami (scored 0-3),  
155 white matter (scored 0-3) and the posterior limb of internal capsule (scored 0-2), where a  
156 higher number indicates more severe injury (Rutherford et al., 2010; Skranes et al., 2017). A  
157 diagnosis of CP was ruled out at 2 years and at 6-8 years based on assessment of motor  
158 function using a standard clinical neurological examination including assessment of tone,  
159 motor function and deep tendon reflexes.

160 The control group consisted of children matched for age, sex and socio-economic status  
161 (Lee-Kelland et al., 2020), recruited via local schools in Bristol, UK and newsletters circulated  
162 at the University of Bristol. Exclusion criteria for controls were as follows: born before 36  
163 weeks gestation; had any history of HIE or other medical problems of a neurological nature  
164 (confirmed using the same neurological clinical examination as for cases); were not native  
165 English speakers.

166 Socio-economic status was measured using the index of multiple deprivation as defined by  
167 the UK Government ([www.gov.uk/government/statistics/english-indices-of-deprivation-](http://www.gov.uk/government/statistics/english-indices-of-deprivation-2019)  
168 2019) based on post code at birth. This is measured on a scale of 1–10, computed from 7  
169 domains of deprivation including income, employment, education, health, crime, barriers to  
170 housing & services and living environment, indicating the decile within which the local area  
171 is ranked in the country, from most deprived to least deprived.

## 172 **Motor Assessment**

173 Assessment of motor function was carried out using the Movement Assessment Battery for  
174 Children, Second Edition (MABC-2) (Henderson et al., 2007). We used MABC-2 as it has high  
175 test-retest reliability, content, construct and criterion validity and has evidence of predictive  
176 validity (Griffiths et al., 2018). This consists of eight raw test scores summarised into three  
177 subscales (aiming and catching, balance, and manual dexterity), each normalised according  
178 to a standardised sample with a mean (standard deviation) of 10 (3). The sum of all test  
179 scores is used to calculate the MABC-2 total score. MABC-2 total scores between the 6th  
180 and 15th centiles indicate a high risk of motor difficulty, and scores  $\leq$ 5th centile indicate  
181 significant motor difficulty. Assessments were videoed and double-scored by a further  
182 assessor unaware of case status. Discrepancies between scores were agreed by consensus.

## 183 **MRI Acquisition**

184 As previously reported (Spencer et al., 2021), images were acquired with a Siemens 3 tesla  
185 Magnetom Skyra MRI scanner at the Clinical Research and Imaging Centre (CRiCBristol),  
186 Bristol, UK. A child-friendly, detailed explanatory video was developed (EC and RLK) and sent  
187 to family at home before assessment day if they wanted and also shown and discussed with  
188 children on the day just prior to the scan. Additionally, experience of the typical sounds  
189 audible in the MRI scanner were provided. Children were placed supine within the 32-  
190 channel receive only head-coil by an experienced radiographer, and head movement was  
191 minimised with memory-foam padding. Children wore earplugs and were able to watch a  
192 film of their choice. A sagittal volumetric T1-weighted anatomical scan was acquired with  
193 the magnetisation-prepared rapid acquisition gradient echo (MPRAGE) sequence using the  
194 following parameters: echo time (TE) = 2.19 ms; inversion time (TI) = 800 ms; repetition  
195 time (TR) = 1500 ms; flip angle = 9°; field of view (FoV) 234 × 250 mm; 176 slices; 1.0 mm

196 isotropic voxels. DWI data were acquired with a multiband echo-planar imaging (EPI)  
197 sequence, using the following parameters: TE = 70 ms; TR = 3150 ms; FoV 192 × 192 mm; 60  
198 slices; 2.0 mm isotropic voxels, flip angle 90°, phase encoding in the anterior-posterior  
199 direction, in-plane acceleration factor = 2 (GRAPPA (Griswold et al., 2002)), through-plane  
200 multi-band factor = 2 (Moeller et al., 2010; Setsompop et al., 2012b, 2012a). Two sets of  
201 diffusion-weighted images, each with  $b = 1,000 \text{ s mm}^{-2}$  in 60 diffusion directions and an  
202 additional eight interspersed  $b = 0$  images, were acquired with a blip-up blip-down  
203 sequence, giving a total of 136 volumes.

## 204 Pre-processing

205 T1-weighted images were denoised with the Advanced Normalization Tools DenoiseImage  
206 tool (<http://github.com/ANTsX/ANTs>) (Manjón et al., 2010). Brain tissue was extracted using  
207 either SPM8-VBM (<http://fil.ion.ucl.ac.uk/spm>) (Ashburner and Friston, 2005) or CAT12  
208 (<http://www.neuro.uni-jena.de/cat>) (Gaser and Dahnke, 2016) depending on which gave  
209 better delineation of the brain surface for each subject. DWI data were corrected for eddy  
210 current induced distortions and subject movements using EDDY (Andersson and  
211 Sotiropoulos, 2016) and TOPUP (Andersson et al., 2003) from the FMRIB Software Library  
212 (FSL, <http://fsl.fmrib.ox.ac.uk>) (Smith et al., 2004).

## 213 Quality Control

214 T1-weighted images were assessed visually and rejected if they had any severe movement  
215 artefacts. The structural pipeline described below was then applied to the remaining scans,  
216 followed by further visual inspection of the parcellation and tissue segmentation. Scans  
217 were rejected at this stage if any moderate artefacts had caused errors in the parcellation or  
218 segmentation. The quality of the DWI data was assessed using the EddyQC tool (Bastiani et  
219 al., 2019) from FSL, which gives metrics indicating the level of movement and eddy currents  
220 in each direction. Scans were rejected if the root-mean-square of these metrics was greater  
221 than one standard deviation above the mean for the whole cohort.

## 222 Tract Microstructure

223 We assessed the relationship between MABC-2 total score and FA in the anterior thalamic  
224 radiation (ATR), cingulate gyrus part of the cingulum (CG), hippocampal part of the cingulum  
225 (CH), corticospinal tract (CST), forceps minor (Fminor), forceps major (Fmajor), inferior



226 fronto-occipital fasciculus (IFOF), inferior longitudinal fasciculus (ILF), superior longitudinal  
227 fasciculus (SLF) and uncinate fasciculus (UF). Anatomical tract locations are shown in Figure  
228 1. These 10 tracts were selected to give comprehensive coverage of major white matter  
229 tracts in the brain to explore their relationship with motor function in this population, as  
230 microstructural alterations have been observed in case children across widespread areas of  
231 white matter (Spencer et al., 2021).

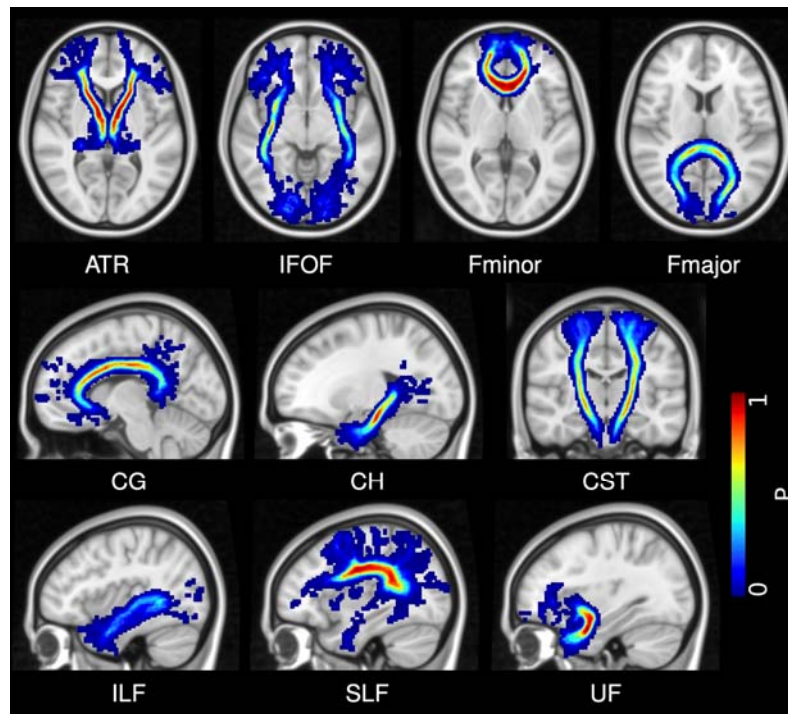

232  
233 **Figure 1:** White matter tracts. We measured average FA in these 10 white matter tracts  
234 using an age-specific probabilistic white matter tract atlas (Spencer et al., 2020). The  
235 probability of a tract occupying any particular voxel is given by the colour bar. ATR =  
236 anterior thalamic radiation; IFOF = inferior fronto-occipital fasciculus; Fminor = forceps  
237 minor; Fmajor = forceps major; CG = cingulate gyrus part of the cingulum; CH = hippocampal  
238 part of the cingulum; CST = corticospinal tract; ILF = inferior longitudinal fasciculus; SLF =  
239 superior longitudinal fasciculus; UF = uncinate fasciculus.

240 To measure FA in each tract, FA images were generated by fitting a tensor model to the DWI  
241 data using the weighted least squares method in FSL's FDT software. The average FA within  
242 each white matter tract was then measured using an age-specific probabilistic atlas of white  
243 matter tracts, which was constructed from the control group from this cohort as part of a  
244 separate study and has been shown to give better delineation of white matter tracts in this

245 age group than an adult atlas (Spencer et al., 2020). Tract FA was calculated as the mean FA  
246 across all voxels within the atlas mask, with each voxel weighted by the probability given by  
247 the atlas mask.

## 248 **Structural Networks**

249 We constructed a structural connectivity network for each subject (Figure 2). Nodes were  
250 defined by parcellating the T1-weighted image into 84 regions, as defined by the Desikan-  
251 Killiany atlas (Desikan et al., 2006), using FreeSurfer (<http://surfer.nmr.mgh.harvard.edu>)  
252 (Fischl, 2012). The FIRST (Patenaude et al., 2011) subcortical segmentation tool from FSL  
253 was combined with the cortical parcellation from FreeSurfer using the labelsgmfix tool from  
254 MRtrix 3.0 ([www.mrtrix.org](http://www.mrtrix.org)) (Tournier et al., 2019), as this gave better segmentation of  
255 subcortical structures than FreeSurfer (including the hippocampus and amygdala).

256 DWI processing and tractography steps, to define network edges, were performed using  
257 MRtrix. The DWI signal for a typical fibre population (the response function) was estimated  
258 from the data (Tournier et al., 2013) and used to calculate the fibre orientation distribution  
259 (FOD) by deconvolving the response function from the measured DWI signal using  
260 constrained-spherical deconvolution (Tournier et al., 2007). A five-tissue-type segmentation  
261 was generated from the T1-weighted image and used to perform anatomically-constrained  
262 tractography with the normalised FOD image (Smith et al., 2012). Tractography was  
263 performed using second-order integration over FODs (Tournier et al., 2010), with step size =  
264 1 mm, minimum length = 50 mm, cutoff FOD magnitude = 0.1, and maximum angle between  
265 steps = 30°. Streamlines were seeded in the interface between grey and white matter and  
266 accepted if they terminated in subcortical or cortical grey matter (Smith et al., 2012). This  
267 method was used to generate 10 million streamlines which were subsequently filtered to 1  
268 million using spherical-convolution informed filtering of tractograms (Smith et al., 2013) in  
269 order to improve biological plausibility and remove length bias. The weighted network for  
270 each subject was then constructed by defining an edge between any pair of nodes  
271 connected by at least one streamline, with edge weight defined by the mean FA along all  
272 streamlines connecting two nodes.

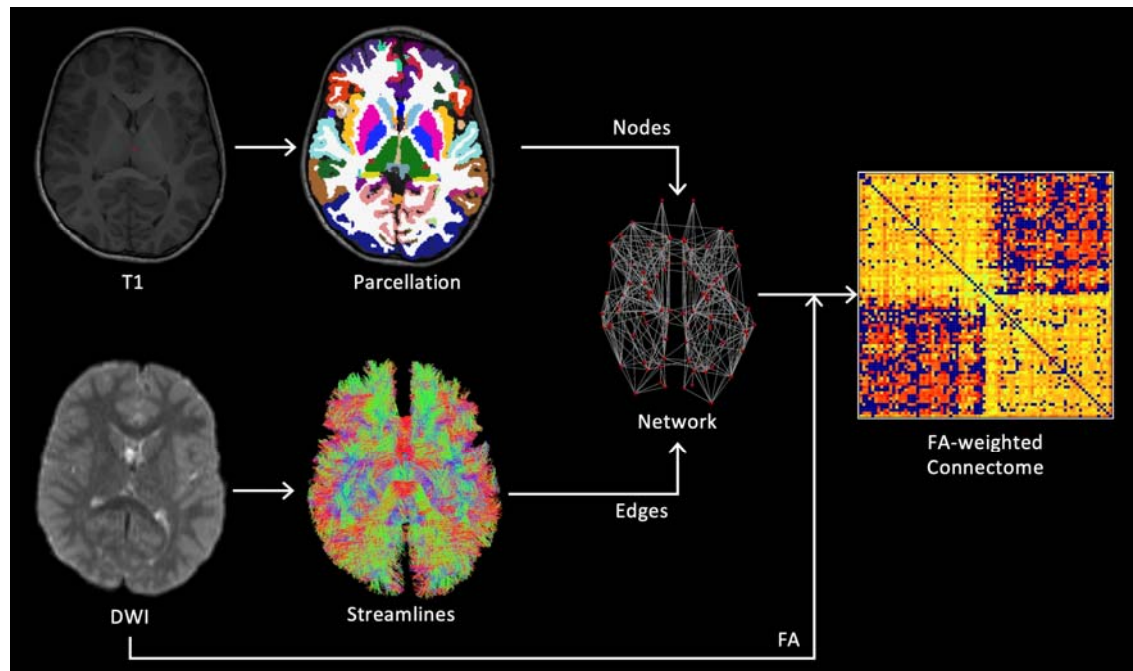

273

274 **Figure 2:** Method for constructing structural connectivity networks from T1 and DWI data.  
275 Nodes were defined by segmentation of the T1-weighted image. Edges were determined by  
276 probabilistic tractography and weighted by the mean FA along all streamlines connecting  
277 the corresponding pair of nodes. The resulting network was represented by a connectivity  
278 matrix. Reproduced from Spencer et al. (2021).

279

## 280 Network Metrics

281 We measured graph-theoretic properties of the FA-weighted structural connectivity  
282 network using the following metrics: average strength, characteristic path length, global  
283 efficiency, local efficiency, clustering coefficient, modularity and small-worldness. For an in-  
284 depth description of these metrics, see Rubinov and Sporns (2010).

285 The node strength is the sum of the weights of all edges connected to a given node. The  
286 mean across all nodes gives the average strength for the network. The characteristic path  
287 length is the average shortest path between all pairs of nodes, where edge distances are  
288 defined inversely to edge weights, making stronger connections equivalent to shorter paths  
289 (note that this does not reflect physical distance between regions in the brain). The global  
290 efficiency is the average over all node pairs of the inverse of the shortest path length. The  
291 characteristic path length and global efficiency both reflect levels of global brain

292 connectivity (with characteristic path length being more dependent on longer paths and  
293 global efficiency more dependent on shorter paths), and are both measures of the potential  
294 for integrated processing (Bullmore and Sporns, 2009; Rubinov and Sporns, 2010).

295 The local efficiency of a given node  $i$  is the inverse shortest path length between each pair of  
296 neighbours of  $i$ , averaged over all pairs of neighbours of  $i$ . This is then averaged across all  
297 nodes to give a measure for the whole network. The clustering coefficient measures the  
298 number of connections between the immediate neighbours of a node as the ratio of the  
299 number of actual edges between the immediate neighbours, modulated by edge weight, to  
300 the maximum possible number of such edges. The modularity indicates how well the  
301 network can be split up into relatively separate communities (i.e. modules) of nodes by  
302 measuring a normalised ratio of the number of within-module connections to the number of  
303 between-module connections, where the optimal modular structure is estimated with  
304 optimisation algorithms. The local efficiency, clustering coefficient and modularity indicate  
305 the efficiency of local information transfer, thus reflecting the potential for segregated  
306 functional processing (Bullmore and Sporns, 2009; Rubinov and Sporns, 2010).

307 Both integration and segregation are required for brain networks to carry out localised and  
308 distributed processing simultaneously (Tononi et al., 1994). The degree to which a network  
309 exhibits both segregation and integration is measured by the small-worldness of the  
310 network (Muldoon et al., 2016; Rubinov and Sporns, 2010). A high degree of small-  
311 worldness is characterised by a high clustering coefficient and low characteristic path length  
312 compared to random graphs. We measured small-worldness with small-world propensity  
313 (Muldoon et al., 2016). All other metrics were calculated with the Brain Connectivity  
314 Toolbox (<http://www.brain-connectivity-toolbox.net>) (Rubinov and Sporns, 2010).

## 315 **Statistical Analysis**

316 We measured the partial Pearson correlation coefficient between tract FA and MABC-2 total  
317 score, with age and sex included as covariates, in the case and control group separately. We  
318 then measured the partial Pearson correlation coefficient between each network metric and  
319 MABC-2 total score, with age and sex included as covariates, in the case and control group  
320 separately. In each of the above tests, false discovery rate (FDR)-correction was applied to  
321 the two-tailed P-values using the Benjamini-Hochberg method (Benjamini and Hochberg,

322 1995). Results with FDR-corrected  $P < 0.05$  were considered significant. Correlation analysis  
323 was performed with MATLAB (R2019b, Mathworks).

324 To explore the relationship between connectivity and motor function, we used NBS (Zalesky  
325 et al., 2012, 2010) to test for group differences in the association between edge weights and  
326 MABC-2 total score. NBS is a nonparametric permutation-based approach for controlling  
327 family-wise error rate (FWER) on the level of subnetworks using the following procedure: 1)  
328 an F-test was performed on each edge to test for group differences in the slope between  
329 edge weight and MABC-2 total score; 2) edges were removed if the corresponding F-statistic  
330 was below a threshold of  $F_{1,52} = 7.1488$  (equivalent to keeping edges with  $P < 0.01$ ); 3) of the  
331 remaining edges, the size (i.e. number of edges) of any connected subnetwork was stored;  
332 4) this process was repeated for 10,000 random permutations of the data to estimate the  
333 null distribution; 5) the FWER-corrected P-value for a subnetwork was then calculated as the  
334 number of permutations for which the largest connected subnetwork in the permuted data  
335 was the same size or larger than the given subnetwork, normalised by the number of  
336 permutations. To further explore edge-level association with domains of the motor  
337 assessment, we repeated this analysis to test for group differences in the dependence of  
338 edge weight on each MABC-2 subscale (aiming and catching, balance, and manual  
339 dexterity). In order to only test robust edges, only connections present in  $>50\%$  of children  
340 in each of the case and control group were assessed. Age and sex were included as  
341 covariates in a general linear model in all tests. Results with FWER-corrected  $P < 0.05$  were  
342 considered significant.

## 343 Visualisation

344 Subnetworks resulting from NBS analysis were visualised with BrainNet Viewer  
345 (<https://www.nitrc.org/projects/bnv/>) (Xia et al., 2013) and as Circos connectograms  
346 (<http://www.circos.ca>) (Krzywinski et al., 2009).

## 347 Results

### 348 Participant Demographics

349 We recruited 51 case and 43 control children for this study (Figure 3). Of these, 7 cases and  
350 4 controls did not want to undergo scanning, and an additional 4 cases had incomplete data

351 due to movement during the scan. Of these 79 scans, DWI quality control led to the  
352 rejection of scans of 6 cases and 2 controls, and a further scan of one child from each group  
353 was rejected due to incorrect image volume placement. This left 33 case and 36 control  
354 scans which passed the DWI quality control and were used in the tract analysis. Of these,  
355 the T1-weighted anatomical scans for 11 cases and 4 controls were not of sufficient quality  
356 to allow segmentation and parcellation, leaving 22 cases and 32 controls for structural  
357 network analysis. Participant demographics are shown in Table 1.

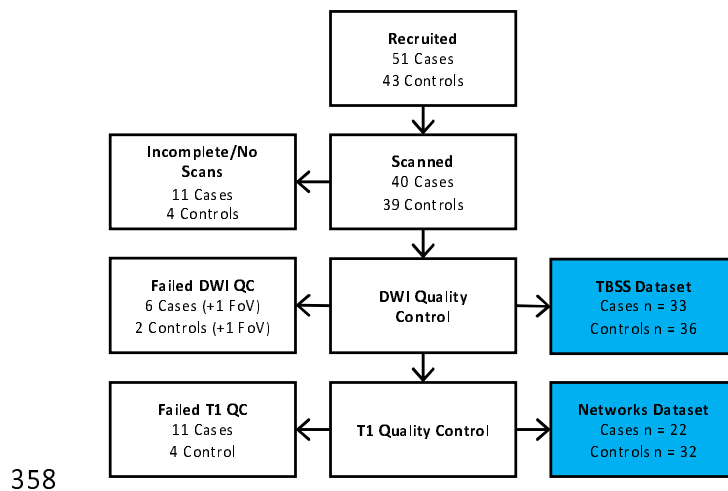

359 **Figure 3:** Flowchart of participants at each stage of recruitment and quality control. FoV =  
360 field of view, indicating the scans which were rejected due to incorrect image volume  
361 placement.

362

363 Anatomical images were visually assessed for focal lesions and abnormal signal intensities.  
364 Small, non-specific white matter signal changes were seen in 1 case and 2 controls in the  
365 tract analysis dataset, and in 1 control in the network analysis dataset. These findings were  
366 judged by a blinded assessor (FC) to be minor and the scans were therefore not excluded.

367 Perinatal clinical information and scores from qualitative assessment of neonatal MRI is also  
368 shown in Table 1. Median scores from assessment of neonatal MRI were low, as expected in  
369 this cohort and the findings unlikely to lead to motor problems from current data and 2-year  
370 follow-up. When measured with Kendall's Tau rank correlation, there was no association  
371 between MABC-2 score and neonatal MRI scores for basal ganglia and thalami ( $r = -0.181$ ,  $p$

372 = 0.2272), white matter ( $r = -0.202$ ,  $p = 0.1509$ ), or posterior limb of the internal capsule ( $r =$   
373  $-0.226$ ,  $p = 0.130$ ).

374 Table 1 also shows that, similar to previously reported findings from a subset of participants  
375 from this cohort (Lee-Kelland et al., 2020), a significantly higher proportion of case children  
376 had MABC-2 total scores less than the 15<sup>th</sup> centile than controls in both the tract analysis  
377 cohort ( $P = 0.0021$ ) and the network analysis cohort ( $P = 0.0041$ ). Additionally, a higher  
378 proportion of case children had manual dexterity scores less than the 15<sup>th</sup> centile than  
379 controls in the tract analysis cohort ( $P = 0.0397$ ), but not the network analysis cohort ( $P =$   
380  $0.0996$ ).

### 381 **Tract Microstructure**

382 We measured the partial correlation between tract-level FA and MABC-2 total score.  
383 Significant correlations were found in the case group with the ATR bilaterally (left:  $r = 0.513$ ,  
384  $P = 0.0191$ ; right:  $r = 0.488$ ,  $P = 0.0191$ ), left CG ( $r = 0.588$ ,  $P = 0.0090$ ), left CH ( $r = 0.541$ ,  $P =$   
385  $0.0153$ ), and IFOF bilaterally (left:  $r = 0.445$ ,  $P = 0.0363$ ; right:  $r = 0.494$ ,  $P = 0.0191$ ). In the  
386 control group, the relationship between tract-level FA and MABC-2 total score exhibited the  
387 same trends as in the case group, but no correlations were significant. Tracts which  
388 exhibited significant correlations are plotted for both groups in Figure 4. Correlation  
389 coefficients for all tracts, as well as uncorrected P-values, are given in Supplementary Table  
390 1.

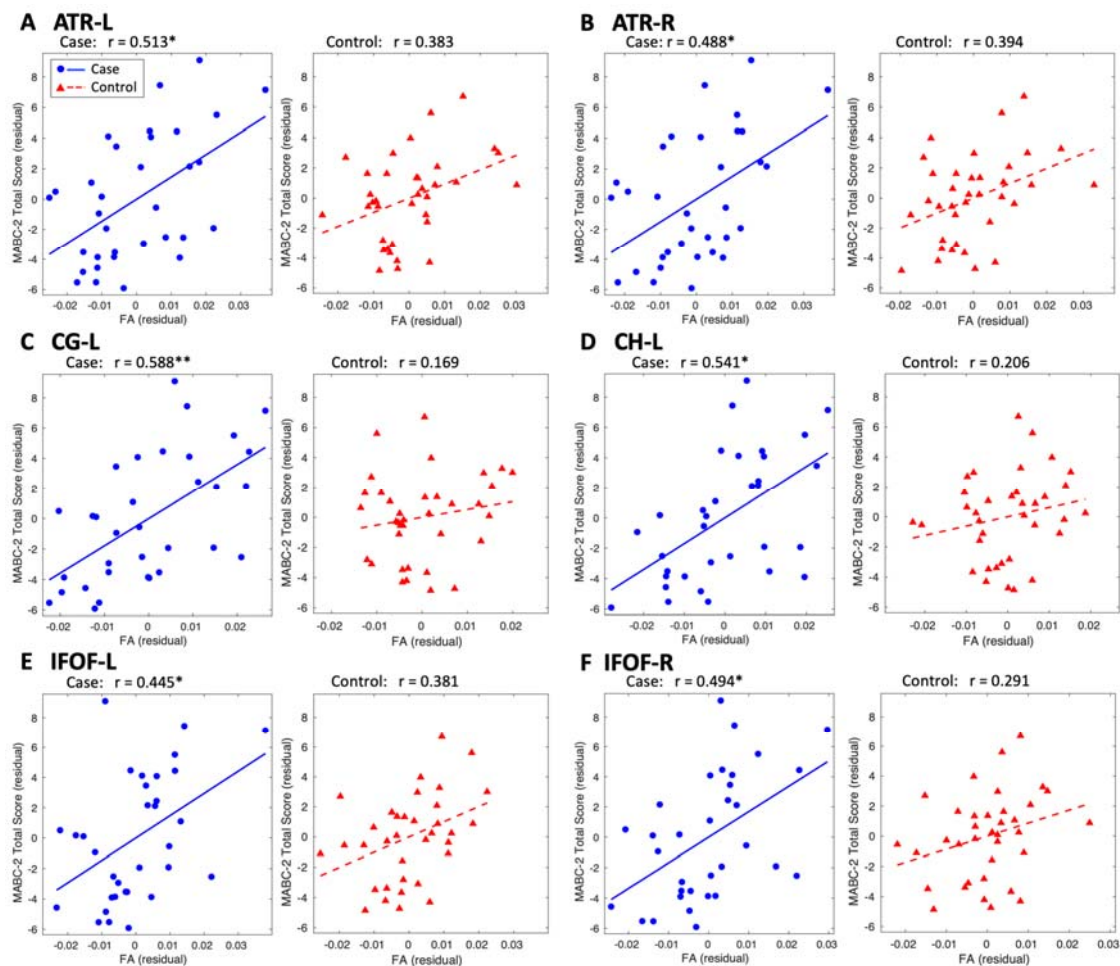

391

392 **Figure 4:** Correlation of tract FA with MABC-2 total score. The partial Pearson correlation  
393 was measured between tract-level FA and MABC-2 total score, controlled for age and sex.  
394 Significant results were only found in cases. For these results, residuals are plotted for cases  
395 (blue circles, solid blue line), with controls also shown for comparison (red triangles, dashed  
396 red line). FDR-corrected: \*P<0.05, \*\*P<0.01.

397

## 398 Structural Network Metrics

399 We measured the partial correlation between structural network metrics and MABC-2 total  
400 score. In cases, significant correlations were found with average node strength, local  
401 efficiency, global efficiency, clustering coefficient, and characteristic path length. In the  
402 control children, the relationship between network metrics and MABC-2 total score



403 exhibited the same trend as in the case children, but no correlations were significant. All  
404 metrics are plotted for both cohorts in Figure 5.

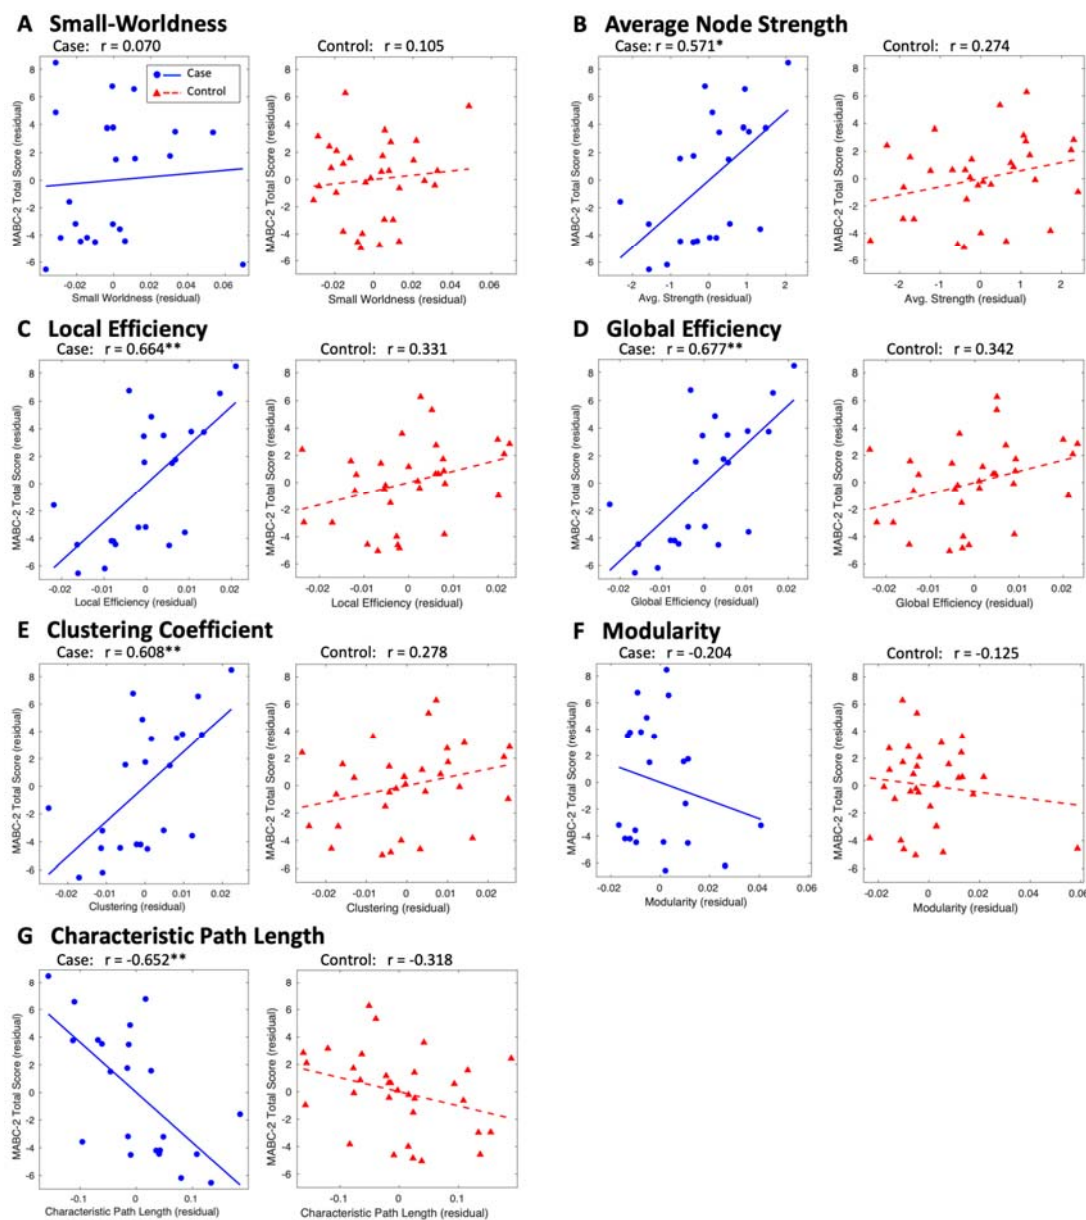

405

406 **Figure 5:** Correlation of structural network metrics with MABC-2 total score. The partial  
407 Pearson correlation was measured between structural network metrics and MABC-2 total  
408 score, controlled for age and sex. Residuals are plotted for cases (blue circles, solid blue line)  
409 and controls (red triangles, dashed red line). FDR-corrected: \* $P < 0.05$ , \*\* $P < 0.01$ .

410

## 411 Network-Based Statistic

412 Group differences were found in the dependence of MABC-2 total score on edge weight ( $P =$   
413 0.0109, Figure 6) in a subnetwork comprising 24 nodes (18 left, 6 right) and 34 edges (13  
414 interhemispheric, 21 intrahemispheric in the left hemisphere). The nodes in the subnetwork  
415 with the most connections include the rostral middle frontal gyrus bilaterally, superior  
416 frontal gyrus bilaterally, left insula, left pars opercularis, left caudal anterior cingulate, pars  
417 triangularis bilaterally, putamen bilaterally. Also included in the subnetwork were the left  
418 inferior temporal gyrus, left middle temporal gyrus, rostral anterior cingulate gyrus  
419 bilaterally, left superior temporal gyrus, left supramarginal gyrus, left temporal pole, left  
420 cerebellum, left banks of the superior temporal sulcus, left caudal middle frontal gyrus, left  
421 inferior parietal gyrus, left precentral gyrus, and right accumbens area.

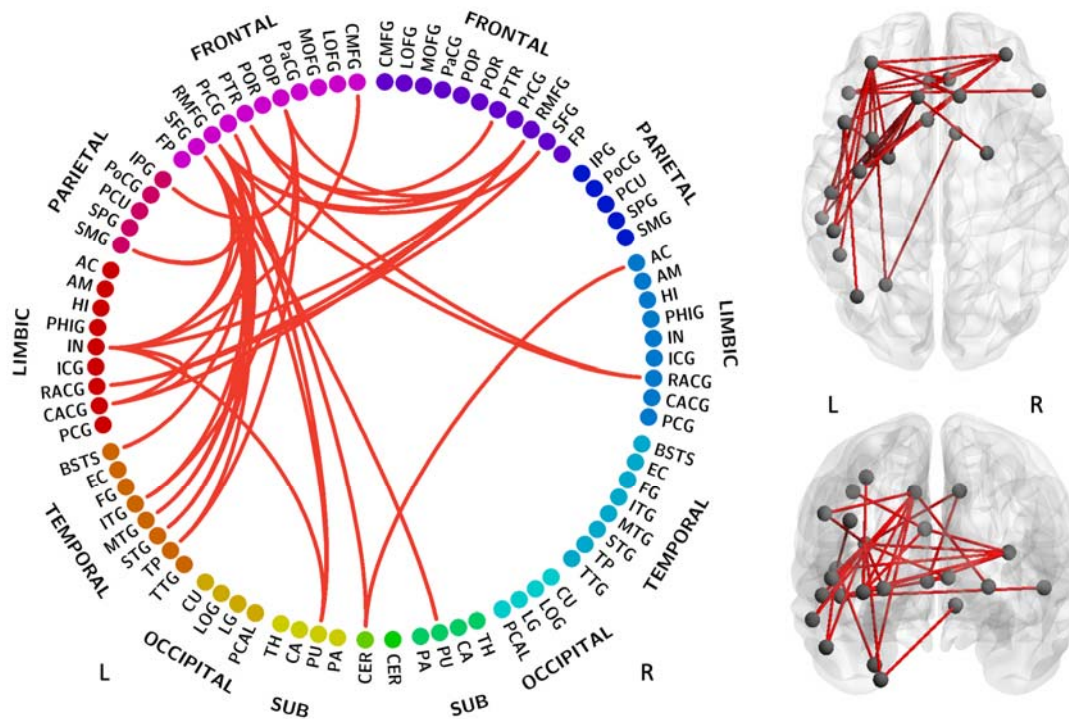

422

423 **Figure 6:** MABC-2 total score subnetwork. The subnetwork shown exhibited group  
424 differences in the dependence of MABC-2 total score on edge weights ( $P = 0.0109$ ). Node  
425 label abbreviations are given in Supplementary Table 3.

426

427 When exploring each subscale of the MABC-2 assessment, group differences were found in  
428 the association between balance scores and edge weight ( $P = 0.0245$ ), and between manual  
429 dexterity scores and edge weight ( $P = 0.0233$ ) but not between aiming and catching scores  
430 and edge weight ( $P > 0.05$ ). The balance subnetwork (Figure 7A) comprised 17 nodes (10  
431 left, 7 right) and 17 edges (9 interhemispheric, 4 intrahemispheric in the left hemisphere, 4  
432 intrahemispheric in the right hemisphere). The nodes in the subnetwork with the most  
433 connections include the rostral middle frontal gyrus bilaterally, pars triangularis bilaterally,  
434 and insula bilaterally. The manual dexterity subnetwork (Figure 7B) comprised 21 nodes (15  
435 left, 6 right) and 21 edges (5 interhemispheric, 14 intrahemispheric in the left hemisphere, 2  
436 intrahemispheric in the right hemisphere). The nodes in this subnetwork with the most  
437 connections include the left superior frontal gyrus, insula bilaterally, left rostral middle  
438 frontal gyrus, left putamen, and right caudate. The complete list of nodes in each  
439 subnetwork is given in Supplementary Table 2.

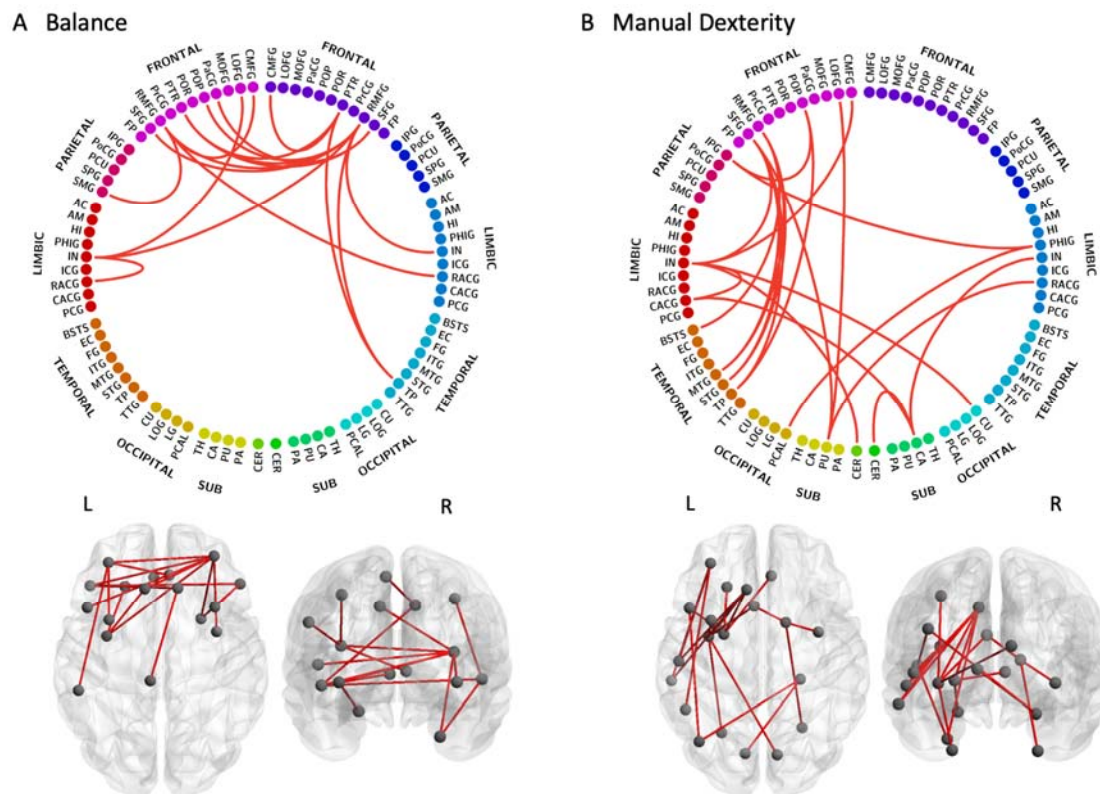

440

441 **Figure 7:** Balance and manual dexterity subnetworks. The subnetworks shown exhibit group  
442 differences in the dependence of MABC-2 subscale scores on edge weight for: A) balance ( $P$

443 = 0.0245); and B) manual dexterity ( $P = 0.0233$ ). Node label abbreviations are given in  
444 Supplementary Table 3.

445

## 446 Discussion

447 In this study, we investigated the association between motor performance and white matter  
448 connectivity in a cohort of early school-age children without CP, who were treated with TH  
449 for HIE at birth, and controls matched for age, sex and socio-economic status. Assessment of  
450 tract-level white matter microstructure revealed an association between MABC-2 total  
451 score and FA in the ATR bilaterally, left CG, left CH, and IFOF bilaterally in cases. No such  
452 relationship was observed in controls. We constructed a structural connectivity network for  
453 each subject to investigate the association between whole-brain connectivity properties and  
454 motor function. We found correlations between MABC-2 total score and average node  
455 strength, local efficiency, global efficiency, clustering coefficient, and characteristic path  
456 length in cases. As before, no significant correlations were found in controls. We then  
457 investigated edge-level associations between connectivity and MABC-2 total score, as well  
458 as each of the MABC-2 subscale scores (aiming and catching, balance, and manual  
459 dexterity). This revealed subnetworks, in which the association between motor outcome  
460 and edge weight was significantly different between cases and controls, for MABC-2 total  
461 scores as well as balance and manual dexterity subscale scores.

### 462 Tract Microstructure Correlates with Motor Function

463 Studies on children with NE, prior to widespread use of TH, have shown that the presence of  
464 lesions on neonatal MRI are strongly associated with both early motor deficits and the  
465 absence of lesions is strongly associated with no motor deficit at 2-3 years (Martinez-Biarge  
466 et al., 2012; Rutherford et al., 1996) and school-age motor outcome of children without CP  
467 (van Kooij et al., 2010). In infants treated with TH (including those who go on to develop CP),  
468 neonatal MRI was predictive of early disability (Rutherford et al., 2010), and FA in the  
469 corticospinal tract and anterior centrum semiovale on neonatal MRI was associated with  
470 motor function at around 2 years of age (Massaro et al., 2015; Tusor et al., 2012). In cooled  
471 infants without CP, motor function at 2 years of age correlated with FA in the posterior limb  
472 of the internal capsule, centrum semiovale, corpus callosum, left cerebral peduncle and

473 brain stem (Tusor et al., 2012). In this study we have shown, in cooled infants without CP at  
474 early school age, that the increased risk of motor impairments (Jary et al., 2019; Lee-Kelland  
475 et al., 2020) is associated with microstructural differences in the ATR bilaterally, left CG, left  
476 CH, and IFOF bilaterally. The absence of significant correlations in the control group, despite  
477 these tracts being associated with motor function in case children, suggests a ceiling effect  
478 whereby the motor performance of control children is more dependent on other factors,  
479 whereas the restricted diffusion in these tracts in cases is associated with impaired motor  
480 function.

481 A few of these children had minor basal ganglia, thalamic and white matter lesions on their  
482 neonatal scans, which may have impaired the development of white matter tracts.  
483 However, median scores were low, thus not expected to result in motor problems  
484 (Rutherford et al., 2010), and lesions were not sufficient to be evidenced by overt  
485 abnormality on the later scans in the vast majority. The neonatal MRI scoring system may be  
486 better for predicting gross motor deficits observable at an earlier age, than the more subtle  
487 impairments assessed through MABC-2 that only become accessible at a later age.

## 488 **Whole-Brain Connectivity Correlates with Motor Outcome**

489 We previously reported no significant differences in group means of network metrics  
490 between cases and controls (Spencer et al., 2021). Despite this, and despite finding no  
491 correlation between network metrics and motor ability in controls, we found a close  
492 relationship between network metrics and motor ability in cases. Thus, white matter  
493 connectivity and brain organisation are more predictive of motor function in case children  
494 than in controls.

495 A large local efficiency and a large clustering coefficient are both indicators of the potential  
496 for functional segregation (i.e. carrying out localised processing amongst locally connected  
497 brain regions) (Rubinov and Sporns, 2010). Conversely, a large global efficiency and a small  
498 characteristic path length are both indicators of the potential for functional integration (i.e.  
499 carrying out distributed processing, combining information from distant brain areas)  
500 (Bullmore and Sporns, 2009; Rubinov and Sporns, 2010). In cases, we found trends of  
501 increasing local efficiency and clustering coefficient with increased motor ability, in addition  
502 to increasing global efficiency and decreasing characteristic path length with increased

503 motor ability, indicating that case children with impaired motor function have reduced  
504 levels of brain network segregation and integration. This trend has previously been  
505 observed in a cohort of 6-month-old infants exposed to HIE (Tymofiyeva et al., 2012). In the  
506 developing brain, alterations to network segregation and integration are thought to be  
507 associated with pruning and myelination respectively (Dennis and Thompson, 2013a;  
508 Tymofiyeva et al., 2014). The impact of hypoxic injury on these mechanisms (Gressens et al.,  
509 2008; O'Brien et al., 2019) may cause long-term alterations to white matter development  
510 (Hüppi and Dubois, 2006) which result in the altered dependence of motor function on  
511 connectivity in case children at school age.

### 512 **Edge-Level Connectivity Correlates with Motor Outcome**

513 NBS analysis revealed subnetworks which expressed group differences in the association  
514 between edge weight and motor function for MABC-2 total score as well as balance and  
515 manual dexterity. No significant result was found for aiming and catching score, possibly  
516 due to the small sample size. The MABC-2 total score subnetwork was left-lateralised, with  
517 numerous fronto-temporal connections as well as some connections to limbic structures.  
518 Frontal lobe regions in the MABC-2 total score subnetwork with known motor association  
519 include the superior frontal gyrus, and rostral and caudal middle frontal gyri. The superior  
520 frontal gyrus contains the supplementary motor area (Martino et al., 2011; Nachev et al.,  
521 2008) and makes long-range connections to the parietal, occipital and temporal lobes via  
522 the IFOF and cingulum (Briggs et al., 2020). The rostral and caudal middle frontal gyri, as  
523 defined by the Desikan-Killiany atlas, correspond to the dorsolateral prefrontal cortex and  
524 the premotor area, respectively (Desikan et al., 2006; Kikinis et al., 2010). The premotor  
525 area is involved in movement representation (Rizzolatti et al., 1996). The dorsolateral  
526 prefrontal cortex is involved in higher-level cognitive functions including working memory  
527 (Barbey et al., 2013) and attention (Japee et al., 2015), but is also associated with motor  
528 function and makes connections to the premotor area, supplementary motor area and  
529 cerebellum (Diamond, 2000).

530 Additional regions in the MABC-2 subnetwork with known involvement in motor function  
531 include the putamen (movement regulation and sensorimotor coordination), cerebellum  
532 (motor control), precentral gyrus (primary motor area), inferior parietal gyrus (motor  
533 function and action representation (Fogassi and Luppino, 2005)), and caudal anterior

534 cingulate gyrus (involved in motor control and is connected to the primary and  
535 supplementary motor areas (Koski and Paus, 2000; Stevens et al., 2011)). The MABC-2  
536 subnetwork also included several regions involved in visual processing, including the  
537 superior temporal gyrus (visual information integration (Karnath, 2001)), inferior temporal  
538 gyrus (visual processing and visual object recognition (Conway, 2018)), and the banks of the  
539 superior temporal sulcus (visual attention and goal-direction action (Shultz et al., 2011)).

540 In addition to these brain regions with known involvement in motor function and visual  
541 processing, the MABC-2 subnetwork comprised several areas associated with higher-level  
542 cognitive function, including the rostral anterior cingulate gyrus (emotion and cognition  
543 (Stevens et al., 2011)), insula (sensorimotor processing as well as emotion, attention and  
544 salience processing (Uddin et al., 2017)), and the pars opercularis and pars triangularis,  
545 which are both involved in language but are also associated with in motor function (Tamada  
546 et al., 1999). The inclusion of these areas possibly reflects the involvement of cognitive  
547 processes in motor function or in understanding and attending to the tasks within the  
548 MABC-2 assessment, or may be due to the association between motor impairment and  
549 reduced cognitive abilities in case children (Jary et al., 2019).

550 The majority of the connections in the balance subnetwork were between areas in the  
551 frontal lobes, with the addition of some limbic areas. Many regions in the balance  
552 subnetwork were also present in the MABC-2 total score subnetwork and are associated  
553 with motor function, including the rostral and caudal middle frontal gyri, superior frontal  
554 gyrus, insula, pars opercularis and pars triangularis. The balance subnetwork also included  
555 the paracentral gyrus which is involved in sensorimotor processing.

556 The manual dexterity subnetwork comprised several fronto-temporal connections in the left  
557 hemisphere, in addition to connections to limbic and subcortical areas. Many of these  
558 regions are involved in motor function and were present in the MABC-2 total score  
559 subnetwork (rostral and caudal middle frontal gyri, superior frontal gyrus, caudal anterior  
560 cingulate gyrus, insula, pars opercularis, inferior parietal gyrus, putamen and cerebellum)  
561 with the addition of the caudate, which is involved in goal-directed action and cognition.  
562 The manual dexterity subnetwork also included several areas involved in visual processing,  
563 for example the superior temporal gyrus and banks of the superior temporal sulcus, which  
564 were also present in the MABC-2 subnetwork, as well as the pericalcarine cortex (visual

565 association area) and cuneus cortex (basic visual processing). The inclusion of visual  
566 processing areas in this subnetwork, and in the MABC-2 subnetwork, possibly reflects the  
567 visual processing demands of constituent tasks in the MABC-2 assessment.

568 The MABC-2 total score subnetwork and the manual dexterity subnetwork both contained  
569 many intrahemispheric connections in the left hemisphere. Additionally, tract-level analysis  
570 revealed correlations in cases between MABC-2 total score and FA in the left CG and CH but  
571 not right. Conversely, in our previous work we found a right-lateralised subnetwork which  
572 exhibited group differences in the dependence of edge weight on processing speed  
573 (Spencer et al., 2021), despite finding no laterality in the areas of white matter with reduced  
574 FA in cases. Additionally, laterality of FA alterations has not been reported in neonates  
575 treated with TH (Tusor et al., 2012). Therefore, the laterality observed in relation to  
576 functional outcome at school-age in cases is unlikely to be due to targeted injury – injury  
577 patterns following HIE are generally bilateral and fairly symmetrical.

578 All case children included in the network analysis dataset were right-handed, however the  
579 handedness data for the rest of the cohort were incomplete. In a very large population  
580 study of white matter in typically developing school-age children, no relationship was found  
581 between handedness and white matter microstructure after correcting for multiple  
582 comparisons (López-Vicente et al., 2021). The laterality observed in relation to motor  
583 outcome in cases may be the result of compensatory mechanisms causing structural  
584 alterations that are differentially highlighted by different domains of the motor  
585 assessments. These mechanisms may affect one hemisphere more than the other  
586 depending on the individual's handedness, and become apparent when observed in  
587 comparison with controls due to the lack of association between handedness and  
588 microstructure in typically developing children (López-Vicente et al., 2021).

## 589 **Strengths and Limitations**

590 To our knowledge, this is the first study to explore the relationship between brain structural  
591 connectivity and motor function in school-age children treated with TH for NE, who did not  
592 develop CP. Anatomically-constrained tractography was performed on high angular  
593 resolution DWI data, using a method capable of resolving crossing fibres (Tournier et al.,  
594 2012, 2008). For tract-level analysis, we used a probabilistic atlas of white matter tracts



595 constructed from the control group, which gives better delineation of white matter tracts in  
596 this age group than an adult atlas (Spencer et al., 2020). Movement artefacts are common in  
597 data acquired from paediatric populations (Phan et al., 2018). Therefore, we used a  
598 thorough quality control pipeline to reject poor quality scans. This resulted in a relatively  
599 small sample size, which is a possible limitation of this study. To ensure robustness of the  
600 NBS results, we only tested edges which were non-zero in the connectomes of over half the  
601 subjects in both the case and control groups. The handedness data for the cohort were  
602 incomplete, therefore we were unable to quantitatively investigate the involvement of  
603 handedness in the association between motor function and white matter microstructure.  
604 Further study is needed to explore the involvement of handedness in the development of  
605 white matter and motor function in case children.

## 606 Conclusion

607 We have identified edge-level, tract-level and whole-brain structural connectivity properties  
608 which correlate with motor outcome assessed robustly in school-age children treated with  
609 TH for HIE at birth, who did not develop CP, but not in controls. Future longitudinal  
610 investigation of brain development from the neonatal period to school age would reveal  
611 how the early microstructural alterations, resulting from injury at birth, lead to the  
612 emergence of these correlations. This would inform therapeutic strategies to promote  
613 healthy development of motor function.

## 614 References

- 615 Andersson, J.L.R., Skare, S., Ashburner, J., 2003. How to correct susceptibility distortions in  
616 spin-echo echo-planar images: application to diffusion tensor imaging. *Neuroimage* 20,  
617 870–888. [https://doi.org/10.1016/S1053-8119\(03\)00336-7](https://doi.org/10.1016/S1053-8119(03)00336-7)
- 618 Andersson, J.L.R., Sotiropoulos, S.N., 2016. An integrated approach to correction for off-  
619 resonance effects and subject movement in diffusion MR imaging. *Neuroimage* 125,  
620 1063–1078. <https://doi.org/10.1016/J.NEUROIMAGE.2015.10.019>
- 621 Ashburner, J., Friston, K.J., 2005. Unified segmentation. *Neuroimage* 26, 839–851.  
622 <https://doi.org/10.1016/j.neuroimage.2005.02.018>
- 623 Assaf, Y., Johansen-Berg, H., Thiebaut de Schotten, M., 2019. The role of diffusion MRI in

- 624 neuroscience. *NMR Biomed.* 32, e3762. <https://doi.org/10.1002/nbm.3762>
- 625 Assaf, Y., Pasternak, O., 2008. Diffusion Tensor Imaging (DTI)-based White Matter Mapping  
626 in Brain Research: A Review. *J. Mol. Neurosci.* 34, 51–61.  
627 <https://doi.org/10.1007/s12031-007-0029-0>
- 628 Azzopardi, D., Strohm, B., Marlow, N., Brocklehurst, P., Deierl, A., Eddama, O., Goodwin, J.,  
629 Halliday, H.L., Juszczak, E., Kapellou, O., Levene, M., Linsell, L., Omar, O., Thoresen, M.,  
630 Tusor, N., Whitelaw, A., Edwards, A.D., 2014. Effects of Hypothermia for Perinatal  
631 Asphyxia on Childhood Outcomes. *N. Engl. J. Med.* 371, 140–149.  
632 <https://doi.org/10.1056/NEJMoa1315788>
- 633 Azzopardi, D. V., Strohm, B., Edwards, A.D., Dyet, L., Halliday, H.L., Juszczak, E., Kapellou, O.,  
634 Levene, M., Marlow, N., Porter, E., Thoresen, M., Whitelaw, A., Brocklehurst, P., 2009.  
635 Moderate Hypothermia to Treat Perinatal Asphyxial Encephalopathy. *N. Engl. J. Med.*  
636 361, 1349–1358. <https://doi.org/10.1056/NEJMoa0900854>
- 637 Barbey, A.K., Koenigs, M., Grafman, J., 2013. Dorsolateral prefrontal contributions to human  
638 working memory. *Cortex* 49, 1195–1205. <https://doi.org/10.1016/j.cortex.2012.05.022>
- 639 Bassett, D.S., Sporns, O., 2017. Network neuroscience. *Nat. Neurosci.* 20, 353–364.  
640 <https://doi.org/10.1038/nn.4502>
- 641 Bastiani, M., Andersson, J.L.R., Cordero-Grande, L., Murgasova, M., Hutter, J., Price, A.N.,  
642 Makropoulos, A., Fitzgibbon, S.P., Hughes, E., Rueckert, D., Victor, S., Rutherford, M.,  
643 Edwards, A.D., Smith, S.M., Tournier, J.-D., Hajnal, J. V., Jbabdi, S., Sotiropoulos, S.N.,  
644 2019. Automated processing pipeline for neonatal diffusion MRI in the developing  
645 Human Connectome Project. *Neuroimage* 185, 750–763.  
646 <https://doi.org/10.1016/J.NEUROIMAGE.2018.05.064>
- 647 Benjamini, Y., Hochberg, Y., 1995. Controlling the False Discovery Rate: A Practical and  
648 Powerful Approach to Multiple Testing. *J. R. Stat. Soc. Ser. B* 57, 289–300.  
649 <https://doi.org/10.1111/j.2517-6161.1995.tb02031.x>
- 650 Briggs, R.G., Khan, A.B., Chakraborty, A.R., Abraham, C.J., Anderson, C.D., Karas, P.J.,  
651 Bonney, P.A., Palejwala, A.H., Conner, A.K., O'Donoghue, D.L., Sughrue, M.E., 2020.  
652 Anatomy and White Matter Connections of the Superior Frontal Gyrus. *Clin. Anat.* 33,

- 653 823–832. <https://doi.org/10.1002/ca.23523>
- 654 Bullmore, E., Sporns, O., 2009. Complex brain networks: graph theoretical analysis of  
655 structural and functional systems. *Nat. Rev. Neurosci.* 10, 186–98.  
656 <https://doi.org/10.1038/nrn2575>
- 657 Cascio, C.J., Gerig, G., Piven, J., 2007. Diffusion tensor imaging: Application to the study of  
658 the developing brain. *J. Am. Acad. Child Adolesc. Psychiatry* 46, 213–223.  
659 <https://doi.org/10.1097/01.chi.0000246064.93200.e8>
- 660 Conway, B.R., 2018. The Organization and Operation of Inferior Temporal Cortex. *Annu. Rev.*  
661 *Vis. Sci.* 4, 381–402. <https://doi.org/10.1146/annurev-vision-091517-034202>
- 662 de Vries, L.S., Jongmans, M.J., 2010. Long-term outcome after neonatal hypoxic-ischaemic  
663 encephalopathy. *Arch. Dis. Child. - Fetal Neonatal Ed.* 95, F220–F224.  
664 <https://doi.org/10.1136/adc.2008.148205>
- 665 Dennis, E.L., Thompson, P.M., 2013a. Mapping connectivity in the developing brain. *Int. J.*  
666 *Dev. Neurosci.* 31, 525–542. <https://doi.org/10.1016/j.ijdevneu.2013.05.007>
- 667 Dennis, E.L., Thompson, P.M., 2013b. Typical and atypical brain development: a review of  
668 neuroimaging studies. *Dialogues Clin. Neurosci.* 15, 359–84.
- 669 Desikan, R.S., Ségonne, F., Fischl, B., Quinn, B.T., Dickerson, B.C., Blacker, D., Buckner, R.L.,  
670 Dale, A.M., Maguire, R.P., Hyman, B.T., Albert, M.S., Killiany, R.J., 2006. An automated  
671 labeling system for subdividing the human cerebral cortex on MRI scans into gyral  
672 based regions of interest. *Neuroimage* 31, 968–980.  
673 <https://doi.org/10.1016/j.neuroimage.2006.01.021>
- 674 Diamond, A., 2000. Close Interrelation of Motor Development and Cognitive Development  
675 and of the Cerebellum and Prefrontal Cortex. *Child Dev.* 71, 44–56.  
676 <https://doi.org/10.1111/1467-8624.00117>
- 677 Dubois, J., Dehaene-Lambertz, G., Kulikova, S., Poupon, C., Hüppi, P.S., Hertz-Pannier, L.,  
678 2014. The early development of brain white matter: A review of imaging studies in  
679 fetuses, newborns and infants. *Neuroscience* 276, 48–71.  
680 <https://doi.org/10.1016/j.neuroscience.2013.12.044>
- 681 Englander, Z.A., Sun, J., Laura Case, Mikati, M.A., Kurtzberg, J., Song, A.W., 2015. Brain

- 682 structural connectivity increases concurrent with functional improvement: Evidence  
683 from diffusion tensor MRI in children with cerebral palsy during therapy. *NeuroImage*  
684 *Clin.* 7, 315–324. <https://doi.org/10.1016/j.nicl.2015.01.002>
- 685 Fischl, B., 2012. FreeSurfer. *Neuroimage* 62, 774–781.  
686 <https://doi.org/10.1016/j.neuroimage.2012.01.021>
- 687 Fogassi, L., Luppino, G., 2005. Motor functions of the parietal lobe. *Curr. Opin. Neurobiol.*  
688 15, 626–631. <https://doi.org/10.1016/j.conb.2005.10.015>
- 689 Fornito, A., Zalesky, A., Breakspear, M., 2013. Graph analysis of the human connectome:  
690 Promise, progress, and pitfalls. *Neuroimage* 80, 426–444.  
691 <https://doi.org/10.1016/j.neuroimage.2013.04.087>
- 692 Gaser, C., Dahnke, R., 2016. CAT-a computational anatomy toolbox for the analysis of  
693 structural MRI data. *HBM* 2016 336–348.
- 694 Gressens, P., Dingley, J., Plaisant, F., Porter, H., Schwendimann, L., Verney, C., Tooley, J.,  
695 Thoresen, M., 2008. Analysis of Neuronal, Glial, Endothelial, Axonal and Apoptotic  
696 Markers Following Moderate Therapeutic Hypothermia and Anesthesia in the  
697 Developing Piglet Brain. *Brain Pathol.* 18, 10–20. [https://doi.org/10.1111/j.1750-](https://doi.org/10.1111/j.1750-3639.2007.00095.x)  
698 [3639.2007.00095.x](https://doi.org/10.1111/j.1750-3639.2007.00095.x)
- 699 Griffiths, A., Toovey, R., Morgan, P.E., Spittle, A.J., 2018. Psychometric properties of gross  
700 motor assessment tools for children: a systematic review. *BMJ Open* 8, e021734.  
701 <https://doi.org/10.1136/bmjopen-2018-021734>
- 702 Griswold, M.A., Jakob, P.M., Heidemann, R.M., Nittka, M., Jellus, V., Wang, J., Kiefer, B.,  
703 Haase, A., 2002. Generalized autocalibrating partially parallel acquisitions (GRAPPA).  
704 *Magn. Reson. Med.* 47, 1202–1210. <https://doi.org/10.1002/mrm.10171>
- 705 Hagmann, P., Sporns, O., Madan, N., Cammoun, L., Pienaar, R., Wedeen, V.J., Meuli, R.,  
706 Thiran, J.-P., Grant, P.E., 2010. White matter maturation reshapes structural  
707 connectivity in the late developing human brain. *Proc. Natl. Acad. Sci.* 107, 19067–  
708 19072. <https://doi.org/10.1073/pnas.1009073107>
- 709 Henderson, S.E., Sugden, D.A., Barnett, A.L., 2007. Movement Assessment Battery for  
710 Children-2. Second edition (MABC-2). Examiner’s manual.

- 711 Hüppi, P.S., Dubois, J., 2006. Diffusion tensor imaging of brain development. *Semin. Fetal*  
712 *Neonatal Med.* 11, 489–497. <https://doi.org/10.1016/j.siny.2006.07.006>
- 713 Jacobs, S.E., Berg, M., Hunt, R., Tarnow-Mordi, W.O., Inder, T.E., Davis, P.G., 2013. Cooling  
714 for newborns with hypoxic ischaemic encephalopathy. *Cochrane Database Syst. Rev.*  
715 <https://doi.org/10.1002/14651858.CD003311.pub3>
- 716 Japee, S., Holiday, K., Satyshur, M.D., Mukai, I., Ungerleider, L.G., 2015. A role of right  
717 middle frontal gyrus in reorienting of attention: a case study. *Front. Syst. Neurosci.* 9.  
718 <https://doi.org/10.3389/fnsys.2015.00023>
- 719 Jary, S., Lee-Kelland, R., Tonks, J., Cowan, F.M., Thoresen, M., Chakkarapani, E., 2019. Motor  
720 performance and cognitive correlates in children cooled for neonatal encephalopathy  
721 without cerebral palsy at school age. *Acta Paediatr. Int. J. Paediatr.* 108, 1773–1780.  
722 <https://doi.org/10.1111/apa.14780>
- 723 Jary, S., Smit, E., Liu, X., Cowan, F.M., Thoresen, M., 2015. Less severe cerebral palsy  
724 outcomes in infants treated with therapeutic hypothermia. *Acta Paediatr.* 104, 1241–  
725 1247. <https://doi.org/10.1111/apa.13146>
- 726 Karnath, H.-O., 2001. New insights into the functions of the superior temporal cortex. *Nat.*  
727 *Rev. Neurosci.* 2, 568–576. <https://doi.org/10.1038/35086057>
- 728 Kikinis, Z., Fallon, J.H., Niznikiewicz, M., Nestor, P., Davidson, C., Bobrow, L., Pelavin, P.E.,  
729 Fischl, B., Yendiki, A., McCarley, R.W., Kikinis, R., Kubicki, M., Shenton, M.E., 2010. Gray  
730 matter volume reduction in rostral middle frontal gyrus in patients with chronic  
731 schizophrenia. *Schizophr. Res.* 123, 153–159.  
732 <https://doi.org/10.1016/j.schres.2010.07.027>
- 733 Koski, L., Paus, T., 2000. Functional connectivity of the anterior cingulate cortex within the  
734 human frontal lobe: a brain-mapping meta-analysis, in: *Executive Control and the*  
735 *Frontal Lobe: Current Issues*. Springer Berlin Heidelberg, Berlin, Heidelberg, pp. 55–65.  
736 [https://doi.org/10.1007/978-3-642-59794-7\\_7](https://doi.org/10.1007/978-3-642-59794-7_7)
- 737 Krzywinski, M., Schein, J., Birol, I., Connors, J., Gascoyne, R., Horsman, D., Jones, S.J., Marra,  
738 M.A., 2009. Circos: An information aesthetic for comparative genomics. *Genome Res.*  
739 19, 1639–1645. <https://doi.org/10.1101/gr.092759.109>

- 740 Le Bihan, D., Johansen-Berg, H., 2012. Diffusion MRI at 25: Exploring brain tissue structure  
741 and function. *Neuroimage* 61, 324–341.  
742 <https://doi.org/10.1016/j.neuroimage.2011.11.006>
- 743 Lebel, C., Walker, L., Leemans, A., Phillips, L., Beaulieu, C., 2008. Microstructural maturation  
744 of the human brain from childhood to adulthood. *Neuroimage* 40, 1044–1055.  
745 <https://doi.org/10.1016/j.neuroimage.2007.12.053>
- 746 Lee-Kelland, R., Jary, S., Tonks, J., Cowan, F.M., Thoresen, M., Chakkarapani, E., 2020.  
747 School-age outcomes of children without cerebral palsy cooled for neonatal hypoxic-  
748 ischaemic encephalopathy in 2008–2010. *Arch. Dis. Child. - Fetal Neonatal Ed.* 105, 8–  
749 13. <https://doi.org/10.1136/archdischild-2018-316509>
- 750 López-Vicente, M., Lamballais, S., Louwen, S., Hillegers, M., Tiemeier, H., Muetzel, R.L.,  
751 White, T., 2021. White matter microstructure correlates of age, sex, handedness and  
752 motor ability in a population-based sample of 3031 school-age children. *Neuroimage*  
753 227, 117643. <https://doi.org/10.1016/j.neuroimage.2020.117643>
- 754 Manjón, J. V., Coupé, P., Martí-Bonmatí, L., Collins, D.L., Robles, M., 2010. Adaptive non-  
755 local means denoising of MR images with spatially varying noise levels. *J. Magn. Reson.*  
756 *Imaging* 31, 192–203. <https://doi.org/10.1002/jmri.22003>
- 757 Marlow, N., 2005. Neuropsychological and educational problems at school age associated  
758 with neonatal encephalopathy. *Arch. Dis. Child. - Fetal Neonatal Ed.* 90, F380–F387.  
759 <https://doi.org/10.1136/adc.2004.067520>
- 760 Martinez-Biarge, M., Bregant, T., Wusthoff, C.J., Chew, A.T.M., Diez-Sebastian, J.,  
761 Rutherford, M.A., Cowan, F.M., 2012. White matter and cortical injury in hypoxic-  
762 ischemic encephalopathy: Antecedent factors and 2-year outcome. *J. Pediatr.* 161,  
763 799–807. <https://doi.org/10.1016/j.jpeds.2012.04.054>
- 764 Martino, J., Gabarrós, A., Deus, J., Juncadella, M., Acebes, J.J., Torres, A., Pujol, J., 2011.  
765 Intrasurgical mapping of complex motor function in the superior frontal gyrus.  
766 *Neuroscience* 179, 131–142. <https://doi.org/10.1016/j.neuroscience.2011.01.047>
- 767 Massaro, A.N., Evangelou, I., Brown, J., Fatemi, A., Vezina, G., McCarter, R., Glass, P.,  
768 Limperopoulos, C., 2015. Neonatal neurobehavior after therapeutic hypothermia for

- 769 hypoxic ischemic encephalopathy. *Early Hum. Dev.* 91, 593–599.  
770 <https://doi.org/10.1016/j.earlhumdev.2015.07.008>
- 771 Moeller, S., Yacoub, E., Olman, C.A., Auerbach, E., Strupp, J., Harel, N., Uğurbil, K., 2010.  
772 Multiband multislice GE-EPI at 7 tesla, with 16-fold acceleration using partial parallel  
773 imaging with application to high spatial and temporal whole-brain fMRI. *Magn. Reson.*  
774 *Med.* 63, 1144–1153. <https://doi.org/10.1002/mrm.22361>
- 775 Morgan, S.E., White, S.R., Bullmore, E.T., Vértes, P.E., 2018. A Network Neuroscience  
776 Approach to Typical and Atypical Brain Development. *Biol. Psychiatry Cogn. Neurosci.*  
777 *Neuroimaging* 3, 754–766. <https://doi.org/10.1016/j.bpsc.2018.03.003>
- 778 Muldoon, S.F., Bridgeford, E.W., Bassett, D.S., 2016. Small-world propensity and weighted  
779 brain networks. *Sci. Rep.* 6, 1–13. <https://doi.org/10.1038/srep22057>
- 780 Nachev, P., Kennard, C., Husain, M., 2008. Functional role of the supplementary and pre-  
781 supplementary motor areas. *Nat. Rev. Neurosci.* 9, 856–869.  
782 <https://doi.org/10.1038/nrn2478>
- 783 O'Brien, C.E., Santos, P.T., Kulikowicz, E., Reyes, M., Koehler, R.C., Martin, L.J., Lee, J.K.,  
784 2019. Hypoxia-Ischemia and Hypothermia Independently and Interactively Affect  
785 Neuronal Pathology in Neonatal Piglets with Short-Term Recovery. *Dev. Neurosci.* 41,  
786 17–33. <https://doi.org/10.1159/000496602>
- 787 O'Connor, C.M., Ryan, C.A., Boylan, G.B., Murray, D.M., 2017. The ability of early serial  
788 developmental assessment to predict outcome at 5 years following neonatal hypoxic-  
789 ischaemic encephalopathy. *Early Hum. Dev.* 110, 1–8.  
790 <https://doi.org/10.1016/j.earlhumdev.2017.04.006>
- 791 Patenaude, B., Smith, S.M., Kennedy, D.N., Jenkinson, M., 2011. A Bayesian model of shape  
792 and appearance for subcortical brain segmentation. *Neuroimage* 56, 907–922.  
793 <https://doi.org/10.1016/j.neuroimage.2011.02.046>
- 794 Phan, T.V., Smeets, D., Talcott, J.B., Vandermosten, M., 2018. Processing of structural  
795 neuroimaging data in young children: Bridging the gap between current practice and  
796 state-of-the-art methods. *Dev. Cogn. Neurosci.* 33, 206–223.  
797 <https://doi.org/10.1016/j.dcn.2017.08.009>

- 798 Rizzolatti, G., Fadiga, L., Gallese, V., Fogassi, L., 1996. Premotor cortex and the recognition of  
799 motor actions. *Cogn. Brain Res.* 3, 131–141. [https://doi.org/10.1016/0926-](https://doi.org/10.1016/0926-6410(95)00038-0)  
800 6410(95)00038-0
- 801 Robertson, C.M.T., Finer, N.N., Grace, M.G.A., 1989. School performance of survivors of  
802 neonatal encephalopathy associated with birth asphyxia at term. *J. Pediatr.* 114, 753–  
803 760. [https://doi.org/10.1016/S0022-3476\(89\)80132-5](https://doi.org/10.1016/S0022-3476(89)80132-5)
- 804 Rubinov, M., Sporns, O., 2010. Complex network measures of brain connectivity: uses and  
805 interpretations. *Neuroimage* 52, 1059–69.  
806 <https://doi.org/10.1016/j.neuroimage.2009.10.003>
- 807 Rutherford, M., Pennock, J., Schwieso, J., Cowan, F., Dubowitz, L., 1996. Hypoxic-ischaemic  
808 encephalopathy: early and late magnetic resonance imaging findings in relation to  
809 outcome. *Arch. Dis. Child. - Fetal Neonatal Ed.* 75, F145–F151.  
810 <https://doi.org/10.1136/fn.75.3.F145>
- 811 Rutherford, M., Ramenghi, L.A., Edwards, A.D., Brocklehurst, P., Halliday, H., Levene, M.,  
812 Strohm, B., Thoresen, M., Whitelaw, A., Azzopardi, D., 2010. Assessment of brain tissue  
813 injury after moderate hypothermia in neonates with hypoxic–ischaemic  
814 encephalopathy: a nested substudy of a randomised controlled trial. *Lancet Neurol.* 9,  
815 39–45. [https://doi.org/10.1016/S1474-4422\(09\)70295-9](https://doi.org/10.1016/S1474-4422(09)70295-9)
- 816 Setsompop, K., Cohen-Adad, J., Gagoski, B.A., Raij, T., Yendiki, A., Keil, B., Wedeen, V.J.,  
817 Wald, L.L., 2012a. Improving diffusion MRI using simultaneous multi-slice echo planar  
818 imaging. *Neuroimage* 63, 569–580. <https://doi.org/10.1016/j.neuroimage.2012.06.033>
- 819 Setsompop, K., Gagoski, B.A., Polimeni, J.R., Witzel, T., Wedeen, V.J., Wald, L.L., 2012b.  
820 Blipped-controlled aliasing in parallel imaging for simultaneous multislice echo planar  
821 imaging with reduced g-factor penalty. *Magn. Reson. Med.* 67, 1210–1224.  
822 <https://doi.org/10.1002/mrm.23097>
- 823 Shultz, S., Lee, S.M., Pelphrey, K., McCarthy, G., 2011. The posterior superior temporal  
824 sulcus is sensitive to the outcome of human and non-human goal-directed actions. *Soc.*  
825 *Cogn. Affect. Neurosci.* 6, 602–611. <https://doi.org/10.1093/scan/nsq087>
- 826 Simmonds, D.J., Hallquist, M.N., Asato, M., Luna, B., 2014. Developmental stages and sex



- 827 differences of white matter and behavioral development through adolescence: A  
828 longitudinal diffusion tensor imaging (DTI) study. *Neuroimage* 92, 356–368.  
829 <https://doi.org/10.1016/J.NEUROIMAGE.2013.12.044>
- 830 Skranes, J.H., Løhaugen, G., Schumacher, E.M., Osredkar, D., Server, A., Cowan, F.M., Stiris,  
831 T., Fugelseth, D., Thoresen, M., 2017. Amplitude-Integrated Electroencephalography  
832 Improves the Identification of Infants with Encephalopathy for Therapeutic  
833 Hypothermia and Predicts Neurodevelopmental Outcomes at 2 Years of Age. *J. Pediatr.*  
834 187, 34–42. <https://doi.org/10.1016/j.jpeds.2017.04.041>
- 835 Smith, R.E., Tournier, J.-D., Calamante, F., Connelly, A., 2013. SIFT: Spherical-deconvolution  
836 informed filtering of tractograms. *Neuroimage* 67, 298–312.  
837 <https://doi.org/10.1016/j.neuroimage.2012.11.049>
- 838 Smith, R.E., Tournier, J.-D., Calamante, F., Connelly, A., 2012. Anatomically-constrained  
839 tractography: Improved diffusion MRI streamlines tractography through effective use  
840 of anatomical information. *Neuroimage* 62, 1924–1938.  
841 <https://doi.org/10.1016/j.neuroimage.2012.06.005>
- 842 Smith, S.M., Jenkinson, M., Woolrich, M.W., Beckmann, C.F., Behrens, T.E.J., Johansen-Berg,  
843 H., Bannister, P.R., De Luca, M., Drobnjak, I., Flitney, D.E., Niazy, R.K., Saunders, J.,  
844 Vickers, J., Zhang, Y., De Stefano, N., Brady, J.M., Matthews, P.M., 2004. Advances in  
845 functional and structural MR image analysis and implementation as FSL. *Neuroimage*  
846 23, S208–S219. <https://doi.org/10.1016/J.NEUROIMAGE.2004.07.051>
- 847 Smyser, C.D., Wheelock, M.D., Limbrick, D.D., Neil, J.J., 2019. Neonatal brain injury and  
848 aberrant connectivity. *Neuroimage* 185, 609–623.  
849 <https://doi.org/10.1016/j.neuroimage.2018.07.057>
- 850 Spencer, A.P.C., Brooks, J.C.W., Masuda, N., Byrne, H., Lee-Kelland, R., Jary, S., Thoresen, M.,  
851 Tonks, J., Goodfellow, M., Cowan, F.M., Chakkarapani, E., 2021. Disrupted brain  
852 connectivity in children treated with therapeutic hypothermia for neonatal  
853 encephalopathy. *NeuroImage Clin.* 30, 102582.  
854 <https://doi.org/10.1016/j.nicl.2021.102582>
- 855 Spencer, A.P.C., Byrne, H., Lee-Kelland, R., Jary, S., Thoresen, M., Cowan, F., Chakkarapani,  
856 E., Brooks, J.C.W., 2020. An Age-Specific Atlas for Delineation of White Matter

- 857 Pathways in Children Aged 6-8 Years. bioRxiv 157222.  
858 <https://doi.org/https://doi.org/10.1101/2020.06.21.157222>
- 859 Sporns, O., Tononi, G., Kötter, R., 2005. The human connectome: A structural description of  
860 the human brain. PLoS Comput. Biol. 1, 0245–0251.  
861 <https://doi.org/10.1371/journal.pcbi.0010042>
- 862 Stevens, F.L., Hurley, R.A., Taber, K.H., 2011. Anterior cingulate cortex: unique role in  
863 cognition and emotion. J. Neuropsychiatry Clin. Neurosci. 23, 121–125.
- 864 Tamada, T., Miyauchi, S., Imamizu, H., Yoshioka, T., Kawato, M., 1999. Cerebro-cerebellar  
865 functional connectivity revealed by the laterality index in tool-use learning.  
866 Neuroreport 10, 325–331.
- 867 Tonks, J., Cloke, G., Lee-Kelland, R., Jary, S., Thoresen, M., Cowan, F.M., Chakkarapani, E.,  
868 2019. Attention and visuo-spatial function in children without cerebral palsy who were  
869 cooled for neonatal encephalopathy: a case-control study. Brain Inj. 33, 894–898.  
870 <https://doi.org/10.1080/02699052.2019.1597163>
- 871 Tononi, G., Sporns, O., Edelman, G.M., 1994. A measure for brain complexity: relating  
872 functional segregation and integration in the nervous system. Proc. Natl. Acad. Sci. U.  
873 S. A. 91, 5033–7.
- 874 Tournier, J.-D., Calamante, F., Connelly, A., 2013. Determination of the appropriate b value  
875 and number of gradient directions for high-angular-resolution diffusion-weighted  
876 imaging. NMR Biomed. 26, 1775–1786. <https://doi.org/10.1002/nbm.3017>
- 877 Tournier, J.-D., Calamante, F., Connelly, A., 2012. MRtrix: Diffusion tractography in crossing  
878 fiber regions. Int. J. Imaging Syst. Technol. 22, 53–66.  
879 <https://doi.org/10.1002/ima.22005>
- 880 Tournier, J.-D., Calamante, F., Connelly, A., 2010. Improved probabilistic streamlines  
881 tractography by 2nd order integration over fibre orientation distributions, in:  
882 Proceedings of the International Society for Magnetic Resonance in Medicine. p. 1670.
- 883 Tournier, J.-D., Calamante, F., Connelly, A., 2007. Robust determination of the fibre  
884 orientation distribution in diffusion MRI: Non-negativity constrained super-resolved  
885 spherical deconvolution. Neuroimage 35, 1459–1472.

- 886 <https://doi.org/10.1016/j.neuroimage.2007.02.016>
- 887 Tournier, J.-D., Smith, R.E., Raffelt, D., Tabbara, R., Dhollander, T., Pietsch, M., Christiaens,  
888 D., Jeurissen, B., Yeh, C.-H., Connelly, A., 2019. MRtrix3: A fast, flexible and open  
889 software framework for medical image processing and visualisation. *Neuroimage* 202,  
890 116137. <https://doi.org/10.1016/j.neuroimage.2019.116137>
- 891 Tournier, J.-D., Yeh, C.-H., Calamante, F., Cho, K.-H., Connelly, A., Lin, C.-P., 2008. Resolving  
892 crossing fibres using constrained spherical deconvolution: Validation using diffusion-  
893 weighted imaging phantom data. *Neuroimage* 42, 617–625.  
894 <https://doi.org/10.1016/J.NEUROIMAGE.2008.05.002>
- 895 Tusor, N., Wusthoff, C., Smeets, N., Merchant, N., Arichi, T., Allsop, J.M., Cowan, F.M.,  
896 Azzopardi, D., Edwards, A.D., Counsell, S.J., 2012. Prediction of neurodevelopmental  
897 outcome after hypoxic–ischemic encephalopathy treated with hypothermia by  
898 diffusion tensor imaging analyzed using tract-based spatial statistics. *Pediatr. Res.* 72,  
899 63–69. <https://doi.org/10.1038/pr.2012.40>
- 900 Tymofiyeva, O., Hess, C.P., Xu, D., Barkovich, A.J., 2014. Structural MRI connectome in  
901 development: Challenges of the changing brain. *Br. J. Radiol.* 87.  
902 <https://doi.org/10.1259/bjr.20140086>
- 903 Tymofiyeva, O., Hess, C.P., Ziv, E., Tian, N., Bonifacio, S.L., McQuillen, P.S., Ferriero, D.M.,  
904 Barkovich, A.J., Xu, D., 2012. Towards the “baby connectome”: Mapping the structural  
905 connectivity of the newborn brain. *PLoS One* 7.  
906 <https://doi.org/10.1371/journal.pone.0031029>
- 907 Uddin, L.Q., Nomi, J.S., Hébert-Seropian, B., Ghaziri, J., Boucher, O., 2017. Structure and  
908 Function of the Human Insula. *J. Clin. Neurophysiol.* 34, 300–306.  
909 <https://doi.org/10.1097/WNP.0000000000000377>
- 910 van Kooij, B.J.M., van Handel, M., Nievelstein, R.A.J., Groenendaal, F., Jongmans, M.J., de  
911 Vries, L.S., 2010. Serial MRI and Neurodevelopmental Outcome in 9- to 10-Year-Old  
912 Children with Neonatal Encephalopathy. *J. Pediatr.* 157, 221-227.e2.  
913 <https://doi.org/10.1016/j.jpeds.2010.02.016>
- 914 van Kooij, B.J.M., van Handel, M., Uiterwaal, C.S.P.M., Groenendaal, F., Nievelstein, R.A.J.,

915 Rademaker, K.J., Jongmans, M.J., de Vries, L.S., 2008. Corpus Callosum Size in Relation  
916 to Motor Performance in 9- to 10-Year-Old Children with Neonatal Encephalopathy.  
917 *Pediatr. Res.* 63, 103–108. <https://doi.org/10.1203/PDR.0b013e31815b4435>

918 van Schie, P.E.M., Schijns, J., Becher, J.G., Barkhof, F., van Weissenbruch, M.M., Vermeulen,  
919 R.J., 2015. Long-term motor and behavioral outcome after perinatal hypoxic-ischemic  
920 encephalopathy. *Eur. J. Paediatr. Neurol.* 19, 354–359.  
921 <https://doi.org/10.1016/j.ejpn.2015.01.005>

922 Xia, M., Wang, J., He, Y., 2013. BrainNet Viewer: A Network Visualization Tool for Human  
923 Brain Connectomics. *PLoS One* 8, e68910.  
924 <https://doi.org/10.1371/journal.pone.0068910>

925 Zalesky, A., Cocchi, L., Fornito, A., Murray, M.M., Bullmore, E., 2012. Connectivity  
926 differences in brain networks. *Neuroimage* 60, 1055–1062.  
927 <https://doi.org/10.1016/j.neuroimage.2012.01.068>

928 Zalesky, A., Fornito, A., Bullmore, E.T., 2010. Network-based statistic: Identifying differences  
929 in brain networks. *Neuroimage* 53, 1197–1207.  
930 <https://doi.org/10.1016/j.neuroimage.2010.06.041>

931

|                                                                                                        | Tract Analysis |                  |         | Network Analysis |                  |         |
|--------------------------------------------------------------------------------------------------------|----------------|------------------|---------|------------------|------------------|---------|
|                                                                                                        | Case (n = 33)  | Control (n = 36) | p       | Case (n = 22)    | Control (n = 32) | p       |
| Age, median (range)                                                                                    | 6.9 (6.0–7.9)  | 7.0 (6.1–7.9)    | 0.5555  | 7.0 (6.0–7.8)    | 7.0 (6.1–7.8)    | 0.5428  |
| Sex, male/female                                                                                       | 18/15          | 19/17            | 0.8894  | 12/10            | 16/16            | 0.7526  |
| Index of Multiple Deprivation, median (range)                                                          | 7 (1–10)       | 7 (2–10)         | 0.5211  | 7 (1–10)         | 7 (2–10)         | 0.8174  |
| <b>MABC-2 Assessment:</b>                                                                              |                |                  |         |                  |                  |         |
| MABC-2 total score, median (range)                                                                     | 9 (3-19)       | 11 (5-18)        | 0.0866  | 10 (3-19)        | 11 (5-18)        | 0.3955  |
| MABC-2 total score <15 <sup>th</sup> centile, n (%)                                                    | 12 (36)        | 2 (6)            | 0.0021* | 9 (41)           | 2 (6)            | 0.0041* |
| Aiming & catching score, median (range)                                                                | 9 (2-15)       | 9 (5-18)         | 0.5090  | 10 (4-15)        | 9 (5-18)         | 0.6967  |
| Aiming & catching score <15 <sup>th</sup> centile, n (%)                                               | 6 (18)         | 2 (6)            | 0.1401  | 4 (18)           | 2 (6)            | 0.2111  |
| Balance score, median (range)                                                                          | 9 (3-19)       | 11 (5-15)        | 0.0782  | 10 (4-19)        | 11.5 (5-15)      | 0.4187  |
| Balance score <15 <sup>th</sup> centile, n (%)                                                         | 7 (21)         | 3 (8)            | 0.1767  | 3 (14)           | 2 (6)            | 0.3875  |
| Manual dexterity score, median (range)                                                                 | 9 (1-18)       | 11 (3-18)        | 0.0773  | 9 (1-18)         | 11 (3-18)        | 0.2620  |
| Manual dexterity score <15 <sup>th</sup> centile, n (%)                                                | 11 (33)        | 4 (11)           | 0.0397* | 7 (32)           | 4 (13)           | 0.0996  |
| <b>Neonatal MRI Assessment:</b>                                                                        |                |                  |         |                  |                  |         |
| BGT, median (range)                                                                                    | 0 (0–2)        | -                | -       | 0 (0–1)          | -                | -       |
| WM, median (range)                                                                                     | 1 (0–3)        | -                | -       | 1 (0–3)          | -                | -       |
| PLIC, median (range)                                                                                   | 0 (0–2)        | -                | -       | 0 (0–1)          | -                | -       |
| <b>Perinatal Clinical Information:</b>                                                                 |                |                  |         |                  |                  |         |
| Mode of delivery, vaginal/instrumental/emergency caesarean in labour/emergency caesarean not in labour | 11/8/10/4      | -                | -       | 8/6/7/1          | -                | -       |
| Assisted ventilation at 10 minutes of age, yes/no                                                      | 24/9           | -                | -       | 17/5             | -                | -       |
| Cardiac compressions required, yes/no                                                                  | 13/20          | -                | -       | 8/14             | -                | -       |

|                                                          |                       |   |   |                       |   |   |
|----------------------------------------------------------|-----------------------|---|---|-----------------------|---|---|
| Apgar score at 10 minutes of age, median (range)         | 6 (0–10)              | - | - | 5 (0–10)              | - | - |
| Worst pH within 1 hour of birth, median (range)          | 6.98 (6.70–7.25)      | - | - | 6.98 (6.77–7.25)      | - | - |
| Worst base excess within 1 hour of birth, median (range) | -16.0 (-31.0 to -4.8) | - | - | -16.1 (-31.0 to -4.8) | - | - |
| Grade of encephalopathy: moderate, n (%)                 | 25 (76)               | - | - | 18 (82)               | - | - |
| Grade of encephalopathy: severe, n (%)                   | 8 (24)                | - | - | 4 (18)                | - | - |
| aEEG abnormalities prior to TH: moderate, n (%)          | 30 (91)               | - | - | 20 (91)               | - | - |
| aEEG abnormalities prior to TH: severe, n (%)            | 3 (9)                 | - | - | 2 (9)                 | - | - |

**Table 1:** Participant demographics for each of the tract analysis and network analysis groups. Perinatal clinical information, as well as scores from neonatal MRI assessment of basal ganglia and thalami (BGT), white matter (WM) and posterior limbs of the internal capsule (PLIC), are given for cases. P-values are shown for case-control comparison of age, index of multiple deprivation, and MABC-2 scores using Wilcoxon rank sum tests, and for case-control comparison of sex, and MABC-2 scores <15<sup>th</sup> centile using Fisher’s exact test. \*P < 0.05. aEEG = amplitude integrated electroencephalogram; MABC-2 = Movement Assessment Battery for Children, Second Edition; TH = therapeutic hypothermia.
